# Supplementary material for: CBX7 and miR‐9 are part of an autoregulatory loop controlling p16INK 4a
Source: PubMed Central journal article supplement (PMC4693451; doi:10.1111/acel.12404), 2015-09-29

**SUPPLEMENTARY FIGURE LEGENDS****Supplementary Figure 1. Retroviral vectors express miR-9 and miR-181.**

IMR90 cells were infected with the indicated vectors and the expression of miR-9 or miR-181 assessed by qRT-PCR.

**Supplementary Figure 2. Controls for CBX7 overexpression and knockdown.**

(A) Overexpression of mouse *Cbx7* results in p16<sup>INK4a</sup> repression. qRT-PCR was carried out in cells used in the experiment described in Fig 2C, to assess the levels of *INK4a* mRNA (encoding for p16<sup>INK4a</sup>) and the exogenously expressed mouse *Cbx7* (*Cbx7*). (B) Knockdown of CBX7 results in p16<sup>INK4a</sup> induction. qRT-PCR was carried out in cells used in the experiment described in Fig 2D-E, to assess *INK4a* and CBX7 mRNA levels.

**Supplementary Figure 3. Characterization of the miR-9 induced arrest.** (A) IMR90 cells were infected with control or miR-9 expressing vectors and the expression of the indicated genes was assessed by qRT-PCR. (B-C) The expression of (B) p21<sup>CIP</sup> and (C) p53 was assessed by IF, and the percentage of positive cells were quantified. (D) miR-9 induces p16<sup>INK4A</sup> expression in IMR90 cells. p16<sup>INK4a</sup> expression was assessed by IF in IMR90 cells transfected with miR-9 or miR-181 mimics or with anti-miR-9.

**Supplementary Figure 4. Analysis of p16<sup>INK4a</sup>-deficient Leiden fibroblasts suggests that miR-9-induced senescence is p16<sup>INK4a</sup>-dependent.**

IMR90 and p16<sup>INK4a</sup>-defective Leiden fibroblasts (Brookes *et al.* 2002) were infected with pMSCV-miR-9 or empty vector. (A) Immunofluorescence for p16<sup>INK4a</sup> was performed in both cells types. Quantification (left) and representative images (right) are shown. (B) Cells were seeded at

low density and stained with crystal violet after 2 weeks. Quantification (left) and representative images (right) are shown. (C) BrdU incorporation was assessed in the indicated cells.

(A)

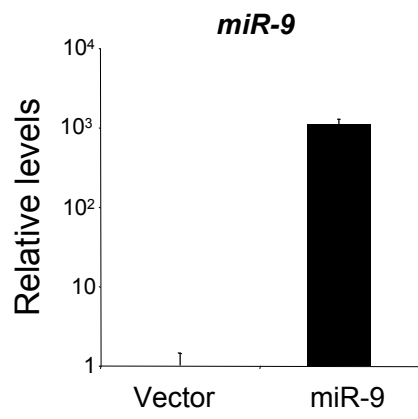

(B)

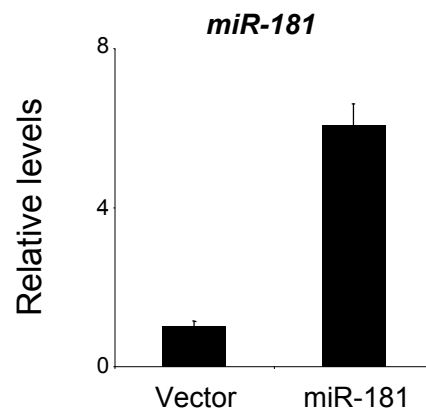

(A)

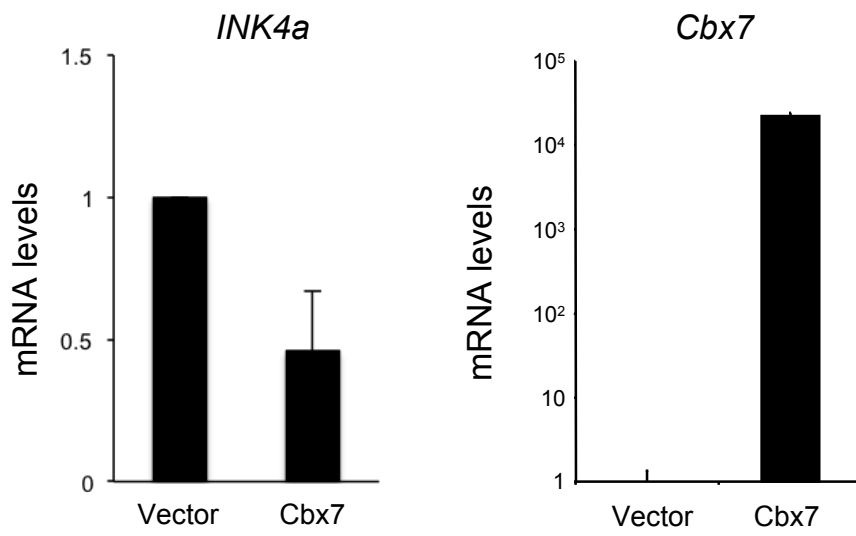

(B)

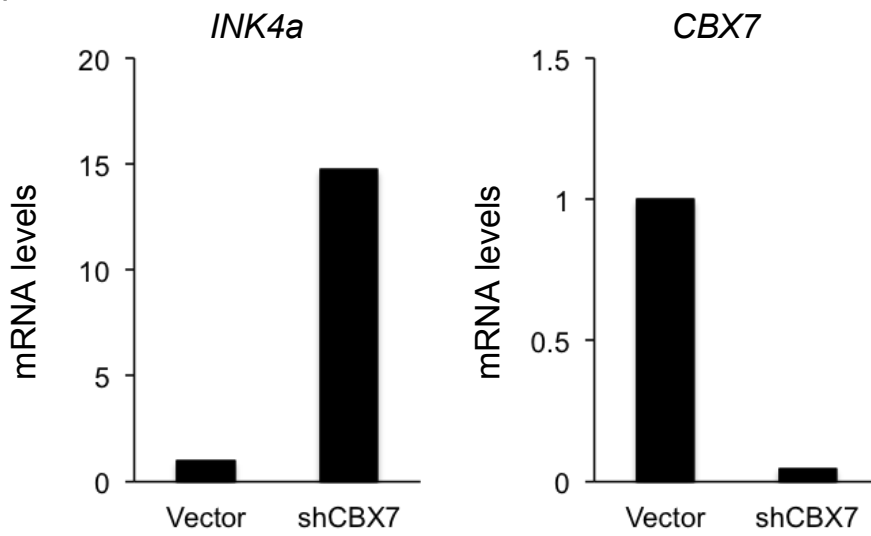

(A)

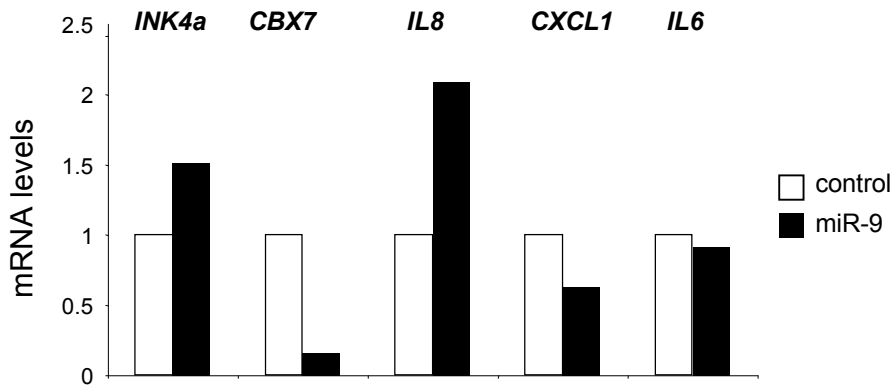

(B)

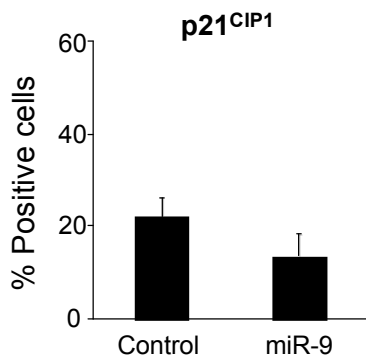

(C)

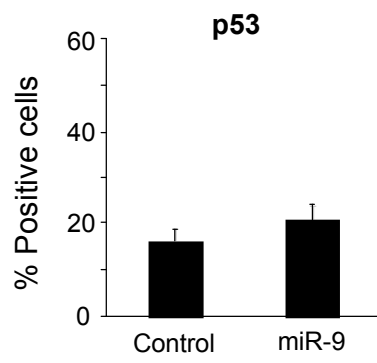

(D)

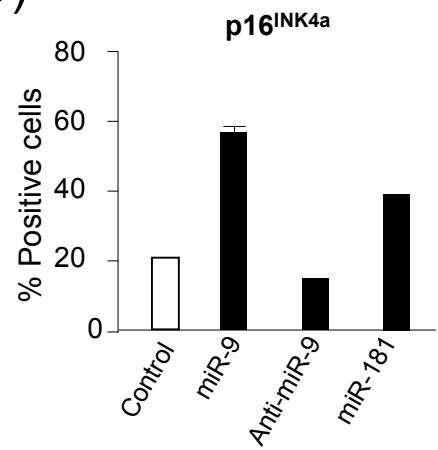

(A)

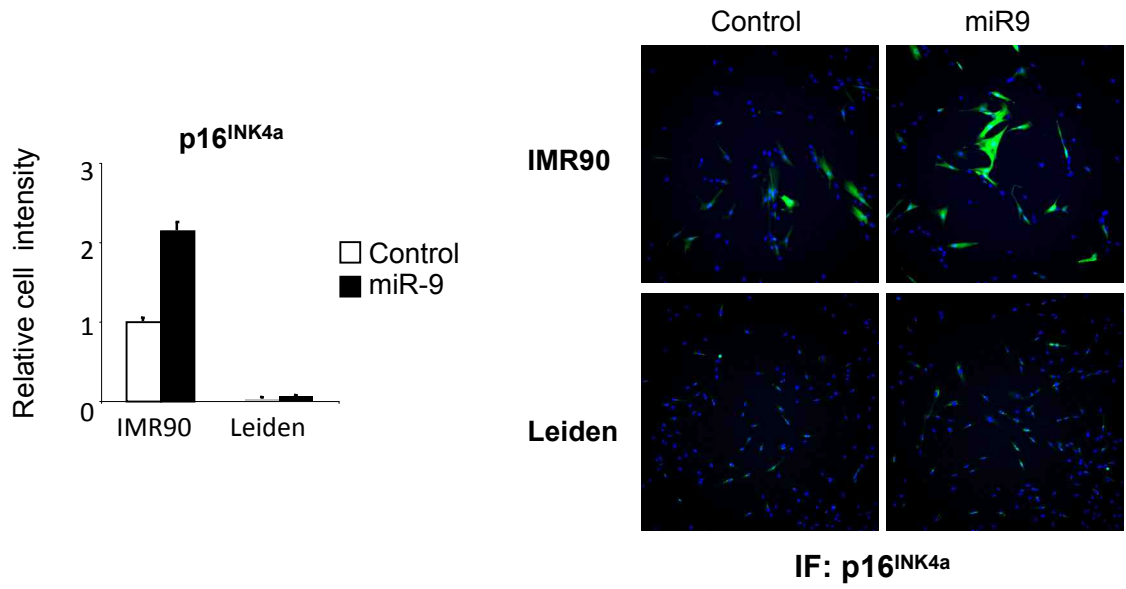

(B)

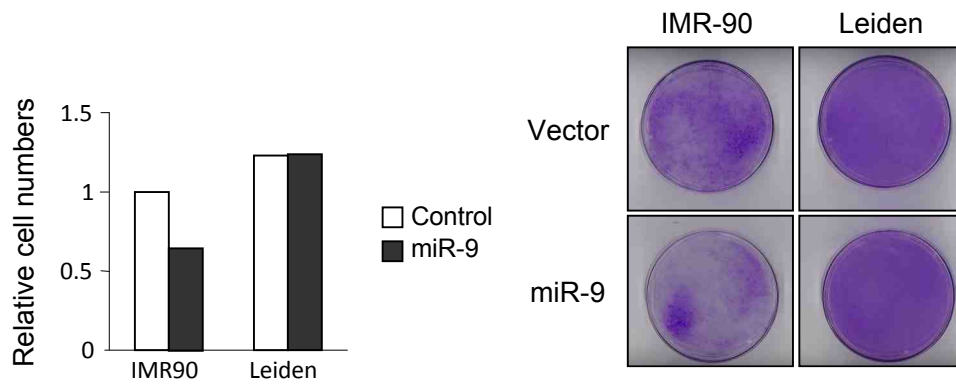

(C)

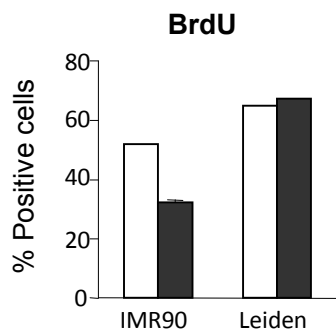

Supplement: ACEL-14-1113-s001.pdf [file ACEL-14-1113-s001.pdf]
